# Supplementary material for: Evolution of Chikungunya virus in mosquito cells
Source: PubMed Central journal article supplement (PMC6212429; doi:10.1038/s41598-018-34561-x), 2018-11-01
Supplement: 41598_2018_34561_MOESM1_ESM.pdf [file 41598_2018_34561_MOESM1_ESM.pdf]

# **Evolution of Chikungunya virus in mosquito cells**

Souand Mohamed Ali<sup>1</sup>, Abdennour Amroun<sup>1</sup>, Xavier de Lamballerie<sup>1</sup>, Antoine Nougairède<sup>1</sup>

## **Affiliations**

<sup>1</sup>: UMR "Émergence des Pathologies Virales" (EPV: Aix-Marseille Univ – IRD 190 – Inserm 1207 – EHESP – IHU Méditerranée Infection), Marseille, France

## **Supplemental data**

**Supplemental figure 1: Mutation emergence kinetic curves**

Average number of substitutions detected in complete genome sequence during serial passages (only substitutions with a frequency  $\geq 20\%$  (A) or  $\geq 75\%$  (B) were considered). Passages 18 and 31 in C6/36 cells are the starting point of serial passages in AE and AA-A20 cells respectively.

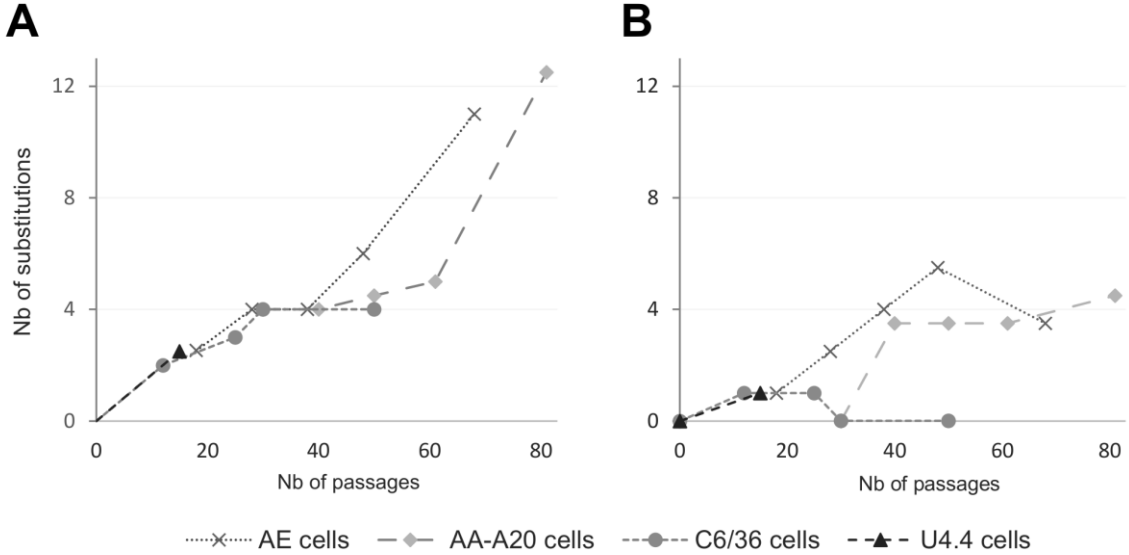

**Supplemental figure 2: Characteristics of the substitutions detected per cell line**

For each cell line, each variable nucleotide position (SNP site) was counted only once.

- A:** All the substitutions detected
- B:** Only substitutions with a frequency  $\geq 20\%$
- C:** Only substitutions with a frequency  $\leq 20\%$

The maximum frequency was considered when one substitution was detected more than once.

n: number of variable nucleotide position (SNP site) detected.

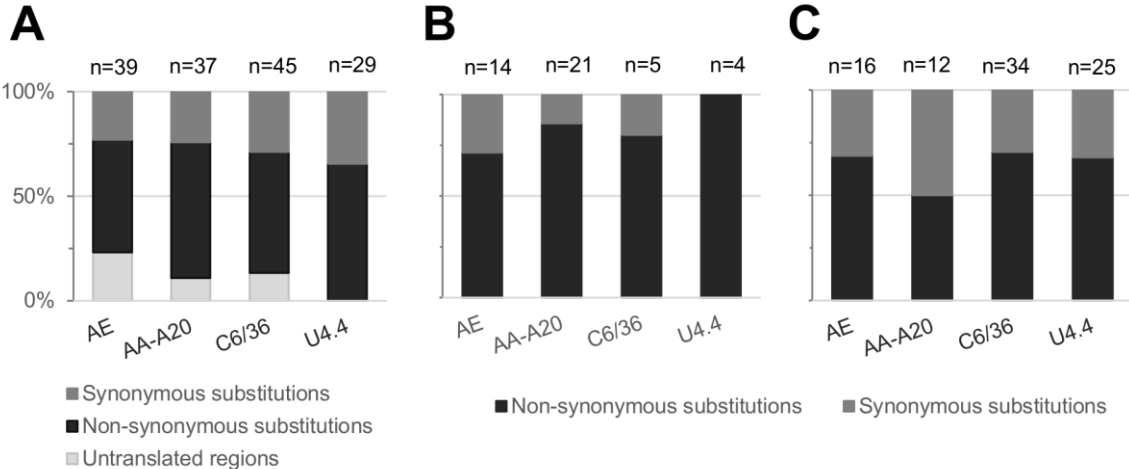

**Supplemental table 1: Substitutions detected after 20 passages in C6/36 cells of a CHIKV strain pre-adapted to Vero cells**

The strain was serially passaged 80 times in Vero cells (pre-adaptation) and then 20 times in duplicate in C6/36 cells. The complete genome sequence of the virus passaged 80 times in Vero cells was used as reference for substitution analysis.

| Nucleotide position | Region | Nucleotide change | AA change | Virus harbouring the mutation         |                                       |
|---------------------|--------|-------------------|-----------|---------------------------------------|---------------------------------------|
|                     |        |                   |           | Duplicate #1 (substitution frequency) | Duplicate #2 (substitution frequency) |
| 202                 | nsP1   | G→C               | A         | 0.25                                  | 1.00                                  |
| 764                 | nsP1   | G→A               | G→R       | 0.25                                  | -                                     |
| 3703                | nsP2   | A→G               |           | 0.25                                  | -                                     |
| 4139                | nsP3   | G→A               | A→R       | 0.25                                  | -                                     |
| 4509                | nsP3   | A→G               | N→G       | 0.50                                  | 1.00                                  |
| 4662                | nsP3   | C→U               | A→V       | 0.25                                  | -                                     |
| 6061                | nsP4   | C→U               | -         | -                                     | 1.00                                  |
| 6104                | nsP4   | G→A               | A→U       | -                                     | 1.00                                  |
| 6272                | nsP4   | A→C               | U→P       | -                                     | 1.00                                  |
| 6279                | nsP4   | G→A               | R→K       | -                                     | 0.25                                  |
| 6407                | nsP4   | U→G               | I→V       | 1.00                                  | -                                     |
| 7113                | nsP4   | G→A               | C→Y       | 0.75                                  | -                                     |
| 8653                | E2     | A→G               | R→G       | -                                     | 0.25                                  |
| 8655                | E2     | A→U               | -         | 0.25                                  | -                                     |
| 8660                | E2     | A→G               | E→G       | 0.75                                  | -                                     |
| 8704                | E2     | G→A               | G→R       | 0.25                                  | -                                     |
| 9293                | E2     | G→A               | R→Q       | 0.75                                  | -                                     |
| 10670               | E1     | U→C               | V→A       | 1.00                                  | 0.50                                  |

**Supplemental table 2: Transitory substitutions detected during serial passage in mosquito cells**

| Nucleotide position | Region   | Nucleotide change | AA change | Virus(es) harbouring the transitory mutation       |                                           |
|---------------------|----------|-------------------|-----------|----------------------------------------------------|-------------------------------------------|
|                     |          |                   |           | Maximum substitution frequency between 20% and 75% | Maximum substitution frequency $\geq$ 75% |
| 4151                | nsP3     | C→U               | R→C       | -                                                  | AE-2, A20-2                               |
| 4295                | nsP3     | U→C               | S→P       | -                                                  | A20-2                                     |
| 6407                | nsp4     | U→G               | I→V       | -                                                  | A20-2                                     |
| 7502                | junction | G→A               | -         | -                                                  | A20-2                                     |
| 7522                | junction | U→C               | -         | -                                                  | AE-2                                      |
| 8702                | E2       | U→C               | I→T       | A20-1                                              | AE-2, A20-2                               |
| 8738                | E2       | A→C               | K→T       | A20-1                                              | -                                         |
| 9777                | E2       | U→C               | -         | -                                                  | AE-2, A20-2                               |

**Supplemental table 3: Follow-up of frequency of shared mutations detected in mosquito cells after 10 passages in Vero cells**

Two viruses already passaged in mosquito cells (C6-1 passage 31; U4-1 passage 15) were then serially passaged 10 times in duplicate in Vero cells. The frequency of the shared mutations present before serial passage in Vero cells was followed using complete genome sequences established after 10 passages in Vero cells.

| Viruses  | Nucleotide position | Region | Nucleotide change | AA change | Frequency of shared mutation before passages in Vero cells | Frequency of shared mutation after 10 passages in Vero cells |              |
|----------|---------------------|--------|-------------------|-----------|------------------------------------------------------------|--------------------------------------------------------------|--------------|
|          |                     |        |                   |           |                                                            | Duplicate #1                                                 | Duplicate #2 |
| C6-1 P31 | 22                  | 5'UTR  | A→U               | -         | 0.62                                                       | 0.40                                                         | 0.53         |
|          | 7189                | nsP4   | G→U               | -         | 0.03                                                       | 0.00                                                         | 0.00         |
|          | 8563-8568           | E2     | Del-GUCUAU        | Del-VY    | 0.75                                                       | 0.00                                                         | 0.00         |
|          | 9037-9039           | E2     | Del-GAG           | Del-E     | 0.04                                                       | 0.00                                                         | 0.00         |
|          | 10670               | E1     | U→C               | V→A       | 0.09                                                       | 0.00                                                         | 0.00         |
| U4-1 P15 | 4151                | nsP3   | C→U               | R→C       | 0.78                                                       | 0.00                                                         | 0.00         |
|          | 4587                | nsP3   | U→C               | I→U       | 0.03                                                       | 0.63                                                         | 0.00         |
|          | 7189                | nsP4   | G→U               | -         | 0.02                                                       | 0.00                                                         | 0.00         |
|          | 9037-9039           | E2     | Del-GAG           | Del-E     | 1.00                                                       | 0.00                                                         | 0.00         |
|          | 10670               | E1     | U→C               | V→A       | 0.26                                                       | 0.00                                                         | 0.00         |

**Supplemental table 4: Mutations detected during serial passage in mosquito cells**

| Nucleotide position | passage | Region | Nucleotide change | AA change | Substitution frequency | Virus harboring the mutation |
|---------------------|---------|--------|-------------------|-----------|------------------------|------------------------------|
| 20                  | 12      | 5'UTR  | G→A               | -         | 0,33                   | C6-2                         |
| 20                  | 25      | 5'UTR  | G→A               | -         | 0,11                   | C6-2                         |
| 22                  | 68      | 5'UTR  | A→U               | -         | 1,00                   | AE-1                         |
| 22                  | 28      | 5'UTR  | A→U               | -         | 1,00                   | AE-1                         |
| 22                  | 38      | 5'UTR  | A→U               | -         | 1,00                   | AE-1                         |
| 22                  | 48      | 5'UTR  | A→U               | -         | 1,00                   | AE-1                         |
| 22                  | 68      | 5'UTR  | A→U               | -         | 1,00                   | AE-2                         |
| 22                  | 41      | 5'UTR  | A→U               | -         | 1,00                   | A20-1                        |
| 22                  | 31      | 5'UTR  | A→U               | -         | 0,62                   | C6-1                         |
| 22                  | 50      | 5'UTR  | A→U               | -         | 0,07                   | C6-1                         |
| 23                  | 38      | 5'UTR  | G→A               | -         | 0,06                   | AE-2                         |
| 24                  | 25      | 5'UTR  | C→U               | -         | 0,02                   | C6-2                         |
| 28                  | 81      | 5'UTR  | C→U               | -         | 0,07                   | A20-2                        |
| 63                  | 50      | 5'UTR  | A→C               | -         | 0,03                   | C6-1                         |
| 103                 | 25      | nsP1   | C→U               | -         | 0,05                   | C6-2                         |
| 202                 | 68      | nsP1   | G→A               | -         | 0,61                   | AE-1                         |
| 202                 | 68      | nsP1   | G→A               | -         | 0,42                   | AE-2                         |
| 226                 | 68      | nsP1   | A→G               | -         | 0,02                   | AE-2                         |
| 226                 | 68      | nsP1   | A→G               | -         | 0,08                   | AE-1                         |
| 319                 | 50      | nsP1   | C→U               | -         | 0,07                   | C6-1                         |
| 442                 | 81      | nsP1   | A→G               | -         | 0,46                   | A20-1                        |
| 442                 | 81      | nsP1   | A→G               | -         | 0,12                   | A20-2                        |
| 504                 | 81      | nsP1   | A→G               | Q→R       | 0,03                   | A20-2                        |
| 764                 | 25      | nsP1   | G→A               | G→R       | 0,03                   | C6-2                         |
| 772                 | 31      | nsP1   | G→A               | -         | 0,02                   | C6-1                         |
| 772                 | 50      | nsP1   | G→A               | -         | 0,05                   | C6-1                         |
| 782                 | 68      | nsP1   | U→C               | C→R       | 0,35                   | AE-1                         |
| 782                 | 68      | nsP1   | U→C               | C→R       | 0,34                   | AE-2                         |
| 1320                | 81      | nsP1   | U→C               | L→P       | 0,50                   | A20-1                        |
| 1320                | 81      | nsP1   | U→C               | L→P       | 0,91                   | A20-2                        |
| 1636                | 15      | nsP1   | U→C               | -         | 0,03                   | U4-2                         |
| 1866                | 15      | nsP2   | U→C               | V→A       | 0,06                   | U4-2                         |
| 1976                | 81      | nsP2   | G→U               | V→L       | 1,00                   | A20-1                        |
| 1976                | 61      | nsP2   | G→U               | V→L       | 1,00                   | A20-1                        |
| 1976                | 81      | nsP2   | G→U               | V→L       | 1,00                   | A20-2                        |
| 1976                | 51      | nsP2   | G→U               | V→L       | 1,00                   | A20-1                        |
| 1988                | 25      | nsP2   | C→U               | -         | 0,97                   | C6-2                         |
| 1988                | 12      | nsP2   | C→U               | -         | 0,97                   | C6-2                         |
| 2850                | 31      | nsP2   | U→C               | V→A       | 0,07                   | C6-1                         |
| 2868                | 51      | nsP2   | A→G               | K→R       | 0,05                   | A20-2                        |
| 3040                | 68      | nsP2   | G→A               | -         | 0,09                   | AE-1                         |
| 3040                | 68      | nsP2   | G→A               | -         | 0,09                   | AE-2                         |
| 3179                | 12      | nsP2   | U→A               | S→T       | 0,04                   | C6-2                         |
| 3263                | 68      | nsP2   | G→A               | V→M       | 0,02                   | AE-2                         |
| 3306                | 15      | nsP2   | U→C               | V→A       | 0,06                   | U4-2                         |
| 3358                | 15      | nsP2   | A→U               | -         | 0,05                   | U4-2                         |
| 3380                | 15      | nsP2   | A→G               | I→V       | 0,03                   | U4-2                         |
| 3402                | 81      | nsP2   | U→C               | F→S       | 0,03                   | A20-1                        |
| 3402                | 81      | nsP2   | U→C               | F→S       | 0,03                   | A20-2                        |
| 3440                | 68      | nsP2   | G→A               | V→M       | 0,37                   | AE-1                         |
| 3440                | 68      | nsP2   | G→A               | V→M       | 0,37                   | AE-2                         |
| 3447                | 31      | nsP2   | C→U               | T→I       | 0,13                   | C6-1                         |
| 3897                | 50      | nsP2   | G→A               | C→Y       | 0,09                   | C6-1                         |
| 3897                | 31      | nsP2   | G→A               | C→Y       | 0,07                   | C6-1                         |
| 4020                | 50      | nsP2   | U→C               | V→A       | 0,10                   | C6-1                         |

|      |    |      |     |     |      |       |
|------|----|------|-----|-----|------|-------|
| 4151 | 48 | nsP3 | C→U | R→C | 1,00 | AE-2  |
| 4151 | 28 | nsP3 | C→U | R→C | 0,99 | AE-2  |
| 4151 | 41 | nsP3 | C→U | R→C | 1,00 | A20-2 |
| 4151 | 38 | nsP3 | C→U | R→C | 1,00 | AE-2  |
| 4151 | 15 | nsP3 | C→U | R→C | 0,78 | U4-1  |
| 4151 | 15 | nsP3 | C→U | R→C | 0,07 | U4-2  |
| 4164 | 50 | nsP3 | G→A | G→D | 0,06 | C6-1  |
| 4167 | 68 | nsP3 | G→A | G→D | 1,00 | AE-1  |
| 4167 | 48 | nsP3 | G→A | G→D | 1,00 | AE-1  |
| 4167 | 50 | nsP3 | G→A | G→D | 0,45 | A20-1 |
| 4167 | 50 | nsP3 | G→A | G→D | 0,47 | A20-2 |
| 4167 | 68 | nsP3 | G→A | G→D | 1,00 | AE-2  |
| 4168 | 50 | nsP3 | C→U | -   | 0,04 | C6-1  |
| 4292 | 15 | nsP3 | U→C | F→L | 0,03 | U4-2  |
| 4295 | 15 | nsP3 | U→C | S→P | 0,11 | U4-2  |
| 4295 | 61 | nsP3 | U→C | S→P | 1,00 | A20-2 |
| 4295 | 51 | nsP3 | U→C | S→P | 1,00 | A20-2 |
| 4416 | 50 | nsP3 | A→C | Y→S | 0,03 | C6-1  |
| 4454 | 15 | nsP3 | C→U | H→Y | 0,05 | U4-2  |
| 4505 | 28 | nsP3 | C→U | R→C | 0,25 | AE-1  |
| 4587 | 50 | nsP3 | U→C | I→T | 0,20 | C6-1  |
| 4587 | 15 | nsP3 | U→C | I→T | 0,03 | U4-1  |
| 4587 | 81 | nsP3 | U→C | I→T | 1,00 | A20-1 |
| 4587 | 61 | nsP3 | U→C | I→T | 1,00 | A20-1 |
| 4587 | 81 | nsP3 | U→C | I→T | 1,00 | A20-2 |
| 4587 | 51 | nsP3 | U→C | I→T | 1,00 | A20-1 |
| 4595 | 15 | nsP3 | G→A | D→N | 0,06 | U4-2  |
| 4772 | 15 | nsP3 | U→C | Y→H | 0,06 | U4-2  |
| 4854 | 15 | nsP3 | U→C | V→A | 0,17 | U4-1  |
| 4855 | 15 | nsP3 | C→U | -   | 0,04 | U4-1  |
| 4927 | 81 | nsP3 | A→G | I→M | 0,48 | A20-1 |
| 4927 | 81 | nsP3 | A→G | I→M | 0,51 | A20-2 |
| 5082 | 68 | nsP3 | C→U | T→I | 0,03 | AE-1  |
| 5160 | 81 | nsP3 | C→U | A→V | 1,00 | A20-1 |
| 5160 | 61 | nsP3 | C→U | A→V | 1,00 | A20-1 |
| 5160 | 81 | nsP3 | C→U | A→V | 1,00 | A20-2 |
| 5160 | 51 | nsP3 | C→U | A→V | 1,00 | A20-1 |
| 5317 | 68 | nsP3 | U→C | -   | 0,64 | AE-1  |
| 5317 | 48 | nsP3 | U→C | -   | 1,00 | AE-1  |
| 5317 | 68 | nsP3 | U→C | -   | 0,62 | AE-2  |
| 5376 | 15 | nsP3 | U→C | L→P | 0,04 | U4-2  |
| 5646 | 25 | nsP3 | G→U | R→I | 0,13 | C6-2  |
| 5705 | 50 | nsP4 | C→A | Q→K | 0,17 | C6-1  |
| 5709 | 51 | nsP4 | A→G | K→R | 0,23 | A20-1 |
| 5715 | 50 | nsP4 | U→C | V→A | 0,08 | C6-1  |
| 5776 | 81 | nsP4 | A→U | -   | 0,08 | A20-1 |
| 5776 | 81 | nsP4 | A→U | -   | 0,07 | A20-2 |
| 5903 | 68 | nsP4 | C→U | -   | 0,02 | AE-2  |
| 6105 | 50 | nsP4 | C→A | A→E | 0,08 | C6-1  |
| 6158 | 68 | nsP4 | A→U | N→Y | 0,37 | AE-1  |
| 6158 | 68 | nsP4 | A→U | N→Y | 0,36 | AE-2  |
| 6407 | 61 | nsP4 | U→G | I→V | 1,00 | A20-2 |
| 6407 | 51 | nsP4 | A→G | I→V | 1,00 | A20-2 |
| 6497 | 25 | nsP4 | C→U | -   | 0,03 | C6-2  |
| 6955 | 61 | nsP4 | A→G | -   | 0,25 | A20-1 |
| 6955 | 81 | nsP4 | A→G | -   | 0,05 | A20-1 |
| 6955 | 81 | nsP4 | A→G | -   | 0,04 | A20-2 |
| 6955 | 51 | nsP4 | A→G | -   | 0,25 | A20-1 |
| 6970 | 81 | nsP4 | U→A | -   | 0,03 | A20-1 |
| 6970 | 81 | nsP4 | U→A | -   | 0,03 | A20-2 |
| 7189 | 31 | nsP4 | G→U | -   | 0,03 | C6-1  |
| 7189 | 25 | nsP4 | G→U | -   | 0,04 | C6-2  |
| 7189 | 15 | nsP4 | G→U | -   | 0,02 | U4-1  |
| 7189 | 12 | nsP4 | G→U | -   | 0,03 | C6-2  |



|      |    |          |     |     |      |       |
|------|----|----------|-----|-----|------|-------|
| 7416 | 68 | nsP4     | U→A | M→K | 0,63 | AE-1  |
| 7416 | 48 | nsP4     | U→A | M→K | 0,75 | AE-1  |
| 7416 | 48 | nsP4     | U→A | M→K | 0,50 | AE-2  |
| 7416 | 81 | nsP4     | U→A | M→K | 0,51 | A20-1 |
| 7416 | 81 | nsP4     | U→A | M→K | 0,50 | A20-2 |
| 7416 | 68 | nsP4     | U→A | M→K | 0,61 | AE-2  |
| 7416 | 38 | nsP4     | U→A | M→K | 0,02 | AE-2  |
| 7502 | 68 | junction | G→A | -   | 0,08 | AE-1  |
| 7502 | 41 | Junction | G→A | -   | 1,00 | A20-2 |
| 7502 | 68 | junction | G→A | -   | 0,08 | AE-2  |
| 7519 | 68 | junction | C→A | -   | 0,38 | AE-1  |
| 7519 | 68 | junction | C→A | -   | 0,36 | AE-2  |
| 7520 | 68 | junction | U→A | -   | 0,03 | AE-2  |
| 7522 | 68 | junction | U→C | -   | 0,04 | AE-1  |
| 7522 | 48 | junction | U→C | -   | 1,00 | AE-2  |
| 7522 | 68 | junction | U→C | -   | 0,05 | AE-2  |
| 7522 | 38 | junction | U→C | -   | 0,88 | AE-2  |
| 7540 | 50 | junction | C→U | -   | 0,09 | C6-1  |
| 7540 | 31 | junction | C→U | -   | 0,07 | C6-1  |
| 8018 | 15 | C        | A→C | K→T | 0,06 | U4-2  |
| 8549 | 51 | E2       | A→G | K→R | 0,04 | A20-1 |
| 8549 | 15 | E2       | A→G | K→R | 0,25 | U4-1  |
| 8564 | 15 | E2       | U→C | V→A | 0,03 | U4-1  |
| 8566 | 50 | E2       | U→C | Y→H | 0,48 | C6-1  |
| 8566 | 25 | E2       | U→C | Y→H | 0,25 | C6-1  |
| 8566 | 31 | E2       | U→C | Y→H | 0,70 | C6-1  |
| 8570 | 12 | E2       | A→C | K→T | 0,46 | C6-2  |
| 8702 | 61 | E2       | U→C | I→T | 0,25 | A20-1 |
| 8702 | 48 | E2       | U→C | I→T | 1,00 | AE-2  |
| 8702 | 28 | E2       | U→C | I→T | 0,75 | AE-2  |
| 8702 | 41 | E2       | U→C | I→T | 1,00 | A20-2 |
| 8702 | 38 | E2       | U→C | I→T | 1,00 | AE-2  |
| 8738 | 81 | E2       | A→C | K→T | 0,44 | A20-1 |
| 8738 | 61 | E2       | A→C | K→T | 0,50 | A20-1 |
| 8738 | 81 | E2       | A→C | K→T | 0,43 | A20-2 |
| 8784 | 15 | E2       | G→A | -   | 0,05 | U4-2  |
| 8836 | 50 | E2       | C→U | H→Y | 0,04 | C6-1  |
| 8920 | 25 | E2       | C→A | H→N | 0,04 | C6-2  |
| 8920 | 38 | E2       | C→A | H→N | 0,03 | AE-2  |
| 9019 | 68 | E2       | A→U | T→S | 0,98 | AE-1  |
| 9019 | 28 | E2       | A→U | T→S | 0,50 | AE-1  |
| 9019 | 38 | E2       | A→U | T→S | 1,00 | AE-1  |
| 9019 | 48 | E2       | A→U | T→S | 1,00 | AE-1  |
| 9019 | 41 | E2       | A→U | T→S | 0,25 | A20-1 |
| 9041 | 15 | E2       | U→C | I→T | 0,02 | U4-1  |
| 9044 | 25 | E2       | A→U | E→V | 0,08 | C6-2  |
| 9054 | 68 | E2       | G→C | M→I | 0,03 | AE-2  |
| 9055 | 68 | E2       | C→G | -   | 0,03 | AE-2  |
| 9058 | 25 | E2       | C→A | P→T | 0,05 | C6-2  |
| 9064 | 68 | E2       | A→G | T→A | 0,03 | AE-1  |
| 9064 | 68 | E2       | A→G | T→A | 0,04 | AE-2  |
| 9157 | 25 | E2       | U→G | S→A | 0,02 | C6-2  |
| 9203 | 50 | E2       | A→U | K→M | 0,04 | C6-1  |
| 9253 | 25 | E2       | A→G | N→D | 0,10 | C6-2  |
| 9254 | 25 | E2       | A→U | N→I | 0,17 | C6-2  |
| 9271 | 25 | E2       | C→U | R→C | 0,13 | C6-2  |
| 9272 | 25 | E2       | G→A | R→H | 0,13 | C6-2  |
| 9297 | 25 | E2       | A→U | K→N | 0,02 | C6-2  |
| 9315 | 25 | E2       | U→C | I→T | 0,10 | C6-2  |
| 9311 | 15 | E2       | U→G | I→S | 0,02 | U4-1  |
| 9311 | 81 | E2       | U→G | I→S | 0,51 | A20-1 |
| 9311 | 81 | E2       | U→G | I→S | 0,52 | A20-2 |
| 9326 | 15 | E2       | C→U | A→V | 0,05 | U4-1  |
| 9328 | 15 | E2       | A→G | N→D | 0,24 | U4-1  |

|       |    |       |     |     |      |       |
|-------|----|-------|-----|-----|------|-------|
| 9328  | 15 | E2    | A→G | N→D | 0,06 | U4-2  |
| 9624  | 15 | E2    | G→A | -   | 0,07 | U4-1  |
| 9663  | 68 | E2    | C→G | -   | 0,02 | AE-1  |
| 9669  | 15 | E2    | C→U | -   | 0,03 | U4-1  |
| 9777  | 38 | E2    | U→C | -   | 0,98 | AE-2  |
| 9777  | 48 | E2    | U→C | -   | 1,00 | AE-2  |
| 9777  | 28 | E2    | U→C | -   | 0,74 | AE-2  |
| 9777  | 41 | E2    | U→C | -   | 1,00 | A20-2 |
| 9904  | 50 | 6K    | C→U | -   | 0,06 | C6-1  |
| 10038 | 51 | E1    | U→C | -   | 0,03 | A20-2 |
| 10069 | 15 | E1    | C→U | P→S | 0,05 | U4-2  |
| 10101 | 15 | E1    | C→U | -   | 0,02 | U4-2  |
| 10339 | 81 | E1    | A→G | T→A | 0,51 | A20-1 |
| 10339 | 81 | E1    | A→G | T→A | 0,53 | A20-2 |
| 10380 | 51 | E1    | A→G | -   | 0,07 | A20-1 |
| 10445 | 81 | E1    | A→G | D→G | 0,06 | A20-1 |
| 10445 | 81 | E1    | A→G | D→G | 0,07 | A20-2 |
| 10449 | 81 | E1    | U→C | -   | 0,07 | A20-1 |
| 10449 | 81 | E1    | U→C | -   | 0,08 | A20-2 |
| 10532 | 68 | E1    | A→C | Y→S | 0,02 | AE-1  |
| 10547 | 68 | E1    | A→U | Y→F | 0,02 | AE-1  |
| 10548 | 68 | E1    | U→A | Y→Z | 0,02 | AE-1  |
| 10631 | 81 | E1    | U→C | V→A | 0,12 | A20-2 |
| 10631 | 68 | E1    | U→C | V→A | 0,05 | AE-2  |
| 10670 | 68 | E1    | U→C | V→A | 0,91 | AE-1  |
| 10670 | 28 | E1    | U→C | V→A | 1,00 | AE-1  |
| 10670 | 38 | E1    | U→C | V→A | 1,00 | AE-1  |
| 10670 | 48 | E1    | U→C | V→A | 1,00 | AE-1  |
| 10670 | 41 | E1    | U→C | V→A | 1,00 | A20-1 |
| 10670 | 61 | E1    | U→C | V→A | 1,00 | A20-1 |
| 10670 | 41 | E1    | U→C | V→A | 1,00 | A20-2 |
| 10670 | 61 | E1    | U→C | V→A | 1,00 | A20-2 |
| 10670 | 25 | E1    | U→C | V→A | 0,50 | C6-1  |
| 10670 | 81 | E1    | U→C | V→A | 0,96 | A20-1 |
| 10670 | 81 | E1    | U→C | V→A | 1,00 | A20-2 |
| 10670 | 48 | E1    | U→C | V→A | 1,00 | AE-2  |
| 10670 | 68 | E1    | U→C | V→A | 0,95 | AE-2  |
| 10670 | 12 | E1    | U→C | V→A | 0,95 | C6-2  |
| 10670 | 50 | E1    | U→C | V→A | 0,68 | C6-1  |
| 10670 | 15 | E1    | U→C | V→A | 0,26 | U4-1  |
| 10670 | 25 | E1    | U→C | V→A | 0,99 | C6-2  |
| 10670 | 28 | E1    | U→C | V→A | 0,98 | AE-2  |
| 10670 | 51 | E1    | U→C | V→A | 1,00 | A20-1 |
| 10670 | 38 | E1    | U→C | V→A | 0,99 | AE-2  |
| 10670 | 51 | E1    | U→C | V→A | 0,98 | A20-2 |
| 10670 | 15 | E1    | U→C | V→A | 0,84 | U4-2  |
| 10670 | 31 | E1    | U→C | V→A | 0,09 | C6-1  |
| 10719 | 68 | E1    | U→C | -   | 0,18 | AE-2  |
| 10719 | 68 | E1    | U→C | -   | 0,28 | AE-1  |
| 10765 | 38 | E1    | G→C | G→R | 0,02 | AE-2  |
| 10778 | 81 | E1    | C→U | A→V | 0,31 | A20-1 |
| 10778 | 81 | E1    | C→U | A→V | 0,31 | A20-2 |
| 10809 | 25 | E1    | C→U | -   | 0,09 | C6-2  |
| 10943 | 50 | E1    | U→C | I→T | 0,07 | C6-1  |
| 10962 | 68 | E1    | C→U | -   | 0,07 | AE-1  |
| 10962 | 51 | E1    | C→U | -   | 0,03 | A20-2 |
| 11008 | 25 | E1    | A→G | I→V | 0,25 | C6-2  |
| 11008 | 12 | E1    | A→G | I→V | 0,04 | C6-2  |
| 11557 | 68 | 3'UTR | C→A | -   | 0,02 | AE-1  |
| 11652 | 25 | 3'UTR | C→U | -   | 0,66 | C6-2  |
| 11652 | 12 | 3'UTR | C→U | -   | 0,04 | C6-2  |
| 11667 | 68 | 3'UTR | A→U | -   | 0,11 | AE-1  |
| 11667 | 81 | 3'UTR | A→U | -   | 0,07 | A20-2 |
| 11667 | 68 | 3'UTR | A→U | -   | 0,16 | AE-2  |

|         |    |          |                         |        |      |       |
|---------|----|----------|-------------------------|--------|------|-------|
| 11731   | 68 | 3'UTR    | A→U                     | -      | 0,03 | AE-2  |
| 7512-26 | 48 | Junction | DEL<br>CAGCUACCUAUUUUUG | -      | 1,00 | AE-1  |
| 7512-26 | 38 | Junction | DEL<br>CAGCUACCUAUUUUUG | -      | 1,00 | AE-2  |
| 7512-26 | 81 | Junction | DEL<br>CAGCUACCUAUUUUUG | -      | 1,00 | A20-1 |
| 7512-26 | 51 | Junction | DEL<br>CAGCUACCUAUUUUUG | -      | 1,00 | A20-2 |
| 8392-94 | 68 | E3       | DEL-UUC                 | Del F  | 0,04 | AE-1  |
| 8392-94 | 68 | E3       | DEL-UUC                 | Del F  | 0,05 | AE-2  |
| 8563-68 | 31 | E2       | DEL-GUCUAU              | Del VY | 0,75 | C6-1  |
| 8563-68 | 50 | E2       | DEL-GUCUAU              | Del VY | 0,05 | C6-1  |
| 9037-39 | 28 | E2       | DEL-GAG                 | Del E  | 1,00 | AE-1  |
| 9037-39 | 38 | E2       | DEL-GAG                 | Del E  | 1,00 | AE-1  |
| 9037-39 | 58 | E2       | DEL-GAG                 | Del E  | 1,00 | AE-1  |
| 9037-39 | 68 | E2       | DEL-GAG                 | Del E  | 1,00 | AE-1  |
| 9037-39 | 28 | E2       | DEL-GAG                 | Del E  | 1,00 | AE-2  |
| 9037-39 | 38 | E2       | DEL-GAG                 | Del E  | 1,00 | AE-2  |
| 9037-39 | 58 | E2       | DEL-GAG                 | Del E  | 1,00 | AE-2  |
| 9037-39 | 68 | E2       | DEL-GAG                 | Del E  | 1,00 | AE-2  |
| 9037-39 | 41 | E2       | DEL-GAG                 | Del E  | 1,00 | A20-1 |
| 9037-39 | 51 | E2       | DEL-GAG                 | Del E  | 1,00 | A20-1 |
| 9037-39 | 61 | E2       | DEL-GAG                 | Del E  | 1,00 | A20-1 |
| 9037-39 | 81 | E2       | DEL-GAG                 | Del E  | 1,00 | A20-1 |
| 9037-39 | 41 | E2       | DEL-GAG                 | Del E  | 1,00 | A20-2 |
| 9037-39 | 51 | E2       | DEL-GAG                 | Del E  | 1,00 | A20-2 |
| 9037-39 | 61 | E2       | DEL-GAG                 | Del E  | 1,00 | A20-2 |
| 9037-39 | 81 | E2       | DEL-GAG                 | DEL E  | 1,00 | A20-2 |
| 9037-39 | 31 | E2       | DEL-GAG                 | DEL E  | 0,04 | C6-1  |
| 9037-39 | 50 | E2       | DEL-GAG                 | DEL E  | 0,23 | C6-1  |
| 9037-39 | 15 | E2       | DEL-GAG                 | DEL E  | 1,00 | U4-1  |
| 9037-39 | 15 | E2       | DEL-GAG                 | DEL E  | 1,00 | U4-2  |

### Supplemental table 5: Summary of sequencing data used in this study

Passages in Vero cells are not represented in this table. Virus name and passage number are represented. NGS means complete genome sequence obtained using NGS method. S means complete genome sequence obtained using Sanger method.

| Virus | p10 | p12 | p15 | p18 | p25 | p28 | p31 | p38 | p41 | p48 | p50 | p51 | p61 | p68 | p81 |
|-------|-----|-----|-----|-----|-----|-----|-----|-----|-----|-----|-----|-----|-----|-----|-----|
| C6-1  | S   | -   | -   | S   | S   | -   | NGS | -   | -   | -   | NGS | -   | -   | -   | -   |
| C6-2  | -   | NGS | -   | -   | NGS | -   | -   | -   | -   | -   | -   | -   | -   | -   | -   |
| U4-1  | -   | -   | NGS | -   | -   | -   | -   | -   | -   | -   | -   | -   | -   | -   | -   |
| U4-2  | -   | -   | NGS | -   | -   | -   | -   | -   | -   | -   | -   | -   | -   | -   | -   |
| A20-1 |     |     |     |     |     |     |     | -   | NGS | -   | -   | NGS | NGS | -   | NGS |
| A20-2 |     |     |     |     |     |     |     | -   | NGS | -   | -   | NGS | NGS | -   | NGS |
| AE-1  |     |     |     |     | -   | NGS | -   | NGS | -   | S   | -   | -   | -   | NGS | -   |
| AE-2  |     |     |     |     | -   | NGS | -   | NGS | -   | S   | -   | -   | -   | NGS | -   |

### Supplemental table 6: Primers used for Next Generation sequencing

| Sequence                 | Forward/Reverse | Nt position |
|--------------------------|-----------------|-------------|
| ATGGCTGCGTGAGACACAC      | Forward 1       | 1-19        |
| GACCTTCGATACATTCCAAA     | Forward 2       | 3079-3098   |
| ACACACTACAGAATGTACTGGCA  | Forward 3       | 6243-6265   |
| CAGCACCGTGTACGATTACTGG   | Forward 4       | 8804-8825   |
| TGAGACCACTGCCTATCATTTA   | Reverse 1       | 3162-3183   |
| GAACCTATCCATTGGTACATC    | Reverse 2       | 6491-6511   |
| CGTACATGAGTGACTAATCTTCCT | Reverse 3       | 8893-8916   |
| GTTCGGAGAATCGTGGAAGAGTTC | Reverse 4       | 11747-11770 |

### Supplemental table 7: Primers and probes used for the real time RT-PCR assays

| Sequence                                         | Forward/Reverse/Probe | Nt position |
|--------------------------------------------------|-----------------------|-------------|
| TGACCGCCATTGTGCATCGTTG                           | Foward                | 2631-2653   |
| GACCTCGTATCCACGATAGTCA                           | Reverse               | 2788-2809   |
| CTGGAGACCTCGTGTTAACGTGCTTCAG<br>(5'FAM; 3'TAMRA) | Probe                 | 2736-2763   |

### Supplemental note 1: list of the CHIKV sequences extracted from GenBank used to determine the variability at 1st+2nd and 3rd codon positions

FJ445502 ; FJ445428 ; FJ513657 ; AB455494 ; AB455493 ; KP003813 ; KP003812 ; KP003810 ; KP003810 ; KP003808 ; KP003807 ; JN558836 ; JN558835 ; JN558834 ; JF274082 ; JQ067624 ; HM045822 ; HM045812 ; HM045809 ; HM045799 ; HM045794 ; HM045792 ; HM045784 ; HQ456253 ; AF490259 ; GU301781 ; GU301780 ; GU301779 ; EU037962 ; GQ905863 ; GU199352 ; GU199350 ; GU013529 ; FJ807899 ; FJ807898 ; FJ807896 ; GQ428215 ; GQ428214 ; GQ428212 ; GQ428211 ; GQ428210 ; FJ959103 ; FJ000065 ; FJ000062 ; EF210157 ; EF027134 ; AM258991
